# Supplementary material for: High Drug Resistance Levels Compromise the Control of HIV Infection in Pediatric and Adult Populations in Bata, Equatorial Guinea
Source: MDPI journal article supplement (doi:10.3390/v15010027), 2022-12-21
Supplement: s1 [file s1]

**Table S1.** Naïve and treated patients with available *pol* sequence.

|                                                                     | No. children/adolescents<br>(%) |               | No. adults*<br>(%) |               | Total<br>cohort |
|---------------------------------------------------------------------|---------------------------------|---------------|--------------------|---------------|-----------------|
|                                                                     | No (naïve)                      | Yes (treated) | No (naïve)         | Yes (treated) |                 |
| <b>Previous ART-exposure</b>                                        |                                 |               |                    |               |                 |
| <b>Number of subjects</b>                                           | 2                               | 56            | 66                 | 113           | 237             |
| <b>Subjects with ≥1<br/>available <i>pol</i> HIV-1<br/>sequence</b> | 2 (100)                         | 43 (76.8)     | 59 (89.4)          | 37 (32.7)     | 141 (59.5)      |
| <b>With PR</b>                                                      | 2                               | 38            | 58                 | 33            | 131             |
| <b>With RT</b>                                                      | 2                               | 38            | 51                 | 30            | 121             |
| <b>With IN</b>                                                      | 2                               | 31            | 41                 | 23            | 97              |
| <b>Only PR</b>                                                      | 0                               | 2 (4.7)       | 5 (8.5)            | 3 (8.1)       | 10 (7.1)        |
| <b>Only RT</b>                                                      | 0                               | 1 (2.3)       | 1 (1.7)            | 0             | 2 (1.4)         |
| <b>Only IN</b>                                                      | 0                               | 2 (4.7)       | 0                  | 2 (5.4)       | 4 (2.8)         |
| <b>PR+RT</b>                                                        | 0                               | 9 (20.9)      | 12 (20.3)          | 11 (29.7)     | 32 (22.7)       |
| <b>RT+IN</b>                                                        | 0                               | 2 (4.7)       | 0                  | 2 (5.4)       | 4 (2.8)         |
| <b>PR+IN</b>                                                        | 0                               | 1 (2.3)       | 3 (5.1)            | 2 (5.4)       | 6 (4.3)         |
| <b>PR+RT+IN</b>                                                     | 2 (100)                         | 26 (60.4)     | 38 (64.4)          | 17 (46)       | 83 (58.9)       |
| <b>With VL&gt;1000 cp/ml</b>                                        | 2 (100)                         | 43 (100)      | 59 (100)           | 37 (100)      | 141 (100)       |

**Table S1 Legend.** ART, antiretroviral therapy; VL, viral load; No, number; PR, protease; RT, reverse transcriptase.  
 \*Among the 96 adults with sequence, 7 (7.3%) were pregnant women, 4 treated and 3 naïve at sampling. Analyzed sequences: total cohort (131PR, 121RT and 97IN), naïve cohort (60PR, 53RT, 43IN), treated cohort (71PR, 68RT, 54IN).

**Table S2.** Naïve and treated patients from Equatorial Guinea with available sequences carrying DRM (2019-2020).

|                                          | Available<br>sequences<br>n and sequenced<br>region | With<br>DRM<br>No. (%) | Only major<br>DRM<br>No. (%) | Major+minor<br>DRM<br>No. (%) | Naïve/treated<br>patients with<br>sequences<br>(NCA/TCA/NA/TA) | Naïve<br>children<br>with major<br>DRM<br>No. (%) | Treated<br>children<br>with major<br>DRM<br>No. (%) | Naïve<br>adults with<br>major<br>DRM<br>No. (%) | Treated<br>adults with<br>major DRM<br>No. (%) |
|------------------------------------------|-----------------------------------------------------|------------------------|------------------------------|-------------------------------|----------------------------------------------------------------|---------------------------------------------------|-----------------------------------------------------|-------------------------------------------------|------------------------------------------------|
| <b>Single resistance</b>                 | <b>141</b>                                          | <b>36 (25.5)</b>       | <b>34 (24.1)</b>             | <b>36 (25.5)</b>              | <b>2/43/59/37</b>                                              | <b>0</b>                                          | <b>7 (16.3)</b>                                     | <b>13 (22)</b>                                  | <b>14 (37.8)</b>                               |
| <b>To NRTI</b>                           | 121 RT                                              | 5 (4.1)                | 6 (5)                        | 5 (4.1)                       | 2/38/51/30                                                     | 0                                                 | 1 (2.6)                                             | 2 (3.9)                                         | 3 (10)                                         |
| <b>To NNRTI</b>                          | 121 RT                                              | 25 (20.7)              | 26 (21.5)                    | 25 (20.7)                     | 2/38/51/30                                                     | 0                                                 | 6 (15.8)                                            | 10 (19.6)                                       | 10 (33.3)                                      |
| <b>To PI</b>                             | 131 PR                                              | 2 (1.5)                | 1 (0.8)                      | 2 (1.5)                       | 2/38/58/33                                                     | 0                                                 | 0                                                   | 0                                               | 1 (3)                                          |
| <b>To INSTI</b>                          | 97 IN                                               | 3 (3.1)                | 1 (1)                        | 3 (3.1)                       | 2/31/41/23                                                     | 0                                                 | 0                                                   | 1 (2.4)                                         | 0                                              |
| <b>Double resistance</b>                 | <b>141</b>                                          | <b>27 (19.1)</b>       | <b>29 (20.6)</b>             | <b>27 (19.1)</b>              | <b>2/43/59/37</b>                                              | <b>0</b>                                          | <b>19 (44.2)</b>                                    | <b>0</b>                                        | <b>10 (27)</b>                                 |
| <b>NRTI+NNRTI</b>                        | 121 RT                                              | 25 (20.7)              | 29 (24)                      | 25 (20.7)                     | 2/38/51/30                                                     | 0                                                 | 19 (50)                                             | 0                                               | 10 (33.3)                                      |
| <b>NRTI+INSTI</b>                        | 87 RT+IN                                            | 1 (1.1)                | 0                            | 1 (1.1)                       | 2/28/38/19                                                     | 0                                                 | 0                                                   | 0                                               | 0                                              |
| <b>NNRTI+INSTI</b>                       | 87 RT+IN                                            | 1 (1.1)                | 0                            | 1 (1.1)                       | 2/28/38/19                                                     | 0                                                 | 0                                                   | 0                                               | 0                                              |
| <b>Triple resistance</b>                 | <b>141</b>                                          | <b>5 (3.5)</b>         | <b>1 (0.7)</b>               | <b>5 (3.5)</b>                | <b>2/43/59/37</b>                                              | <b>0</b>                                          | <b>1 (2.3)</b>                                      | <b>0</b>                                        | <b>0</b>                                       |
| <b>NRTI+NNRT+PI</b>                      | 115 PR+RT                                           | 1 (0.9)                | 1 (0.9)                      | 1 (0.9)                       | 2/35/50/28                                                     | 0                                                 | 1 (2.9)                                             | 0                                               | 0                                              |
| <b>NRTI+NNRTI+INSTI</b>                  | 87 RT+IN                                            | 4 (4.6)                | 0                            | 4 (4.6)                       | 2/28/38/19                                                     | 0                                                 | 0                                                   | 0                                               | 0                                              |
| <b>Quadruple resistance</b>              | <b>141</b>                                          | <b>0</b>               | <b>0</b>                     | <b>0</b>                      | <b>2/43/59/37</b>                                              | <b>0</b>                                          | <b>0</b>                                            | <b>0</b>                                        | <b>0</b>                                       |
| <b>NRTI+NNRTI+PI+INSTI</b>               | 83                                                  | 0                      | 0                            | 0                             | 2/26/38/17                                                     | 0                                                 | 0                                                   | 0                                               | 0                                              |
| <b>Summary resistance by ARV-classes</b> |                                                     |                        |                              |                               |                                                                |                                                   |                                                     |                                                 |                                                |
| <b>No DRM</b>                            | 141                                                 | 74 (52.5)              | 77 (54.6)                    | 74 (52.5)                     | 2/43/59/37                                                     | 2                                                 | 16 (37.2)                                           | 46 (78)                                         | 13 (35.1)                                      |
| <b>With DRM</b>                          | 141                                                 | 67 (47.5)              | 64 (45.4)                    | 67 (47.5)                     | 2/43/59/37                                                     | 0                                                 | 27 (62.8)                                           | 13 (22)                                         | 24 (64.9)                                      |
| <b>NRTI</b>                              | 121 RT                                              | 36 (29.8)              | 36 (29.8)                    | 36 (29.8)                     | 2/38/51/30                                                     | 0                                                 | 21 (55.3)                                           | 2 (3.9)                                         | 13 (43.3)                                      |
| <b>NNRTI</b>                             | 121 RT                                              | 56 (46.3)              | 56 (46.3)                    | 56 (46.3)                     | 2/38/51/30                                                     | 0                                                 | 26 (68.4)                                           | 10 (19.6)                                       | 20 (66.7)                                      |
| <b>PI</b>                                | 131 PR                                              | 3 (2.3)                | 2 (1.5)                      | 3 (2.3)                       | 2/38/58/33                                                     | 0                                                 | 1 (2.6)                                             | 0                                               | 1 (3)                                          |
| <b>INSTI</b>                             | 97 IN                                               | 9 (9.3)                | 1 (1)                        | 9 (9.3)                       | 2/31/41/23                                                     | 0                                                 | 0                                                   | 1 (2.4)                                         | 0                                              |

**Table S2 legend.** Available sequences in 141 participants from Equatorial Guinea under study with DBS samples collected during 2019-2020: 131PR, 121RT and 97IN. **No, number;** NCA, naïve children and adolescents; TCA, treated children and adolescents; NA, naïve adults; TA, treated adults; only major-DRM, DRM present when only considering major-DRM; major + minor-DRM, DRM present when considering major and minor-DRM; single resistance, to one ARV-class; double resistance, to two ARV-classes; triple resistance, to three ARV-classes; quadruple resistance, to four ARV-classes; no DRM, no DRM found in the available regions per patient. n, number of patients; DRM, drug resistance mutation; ARV, antiretroviral; NRTI, nucleoside reverse transcriptase inhibitors; NNRTI, non-NRTI; PI, protease inhibitors; INSTI, integrase strand transfer inhibitors. We only considered major-DRM to PI, major-DRM to INSTI and DRM to NRTI and to NNRTI, according to Stanford v9.0. Resistance data was absent in all subjects with viraemia below 1000 HIV-1 RNA copies/ml and in 32.2% of those with more than 1000 HIV-1 RNA copies/ml at sampling.

**Table S3.** DRM in resistant viruses in naïve and treated population from Equatorial Guinea with available *pol* sequence.

| DRM                 | 2 naïve children<br>No. (%) | 43 naïve<br>No. (%)    | 59 naïve adults<br>No. (%) | 37 treated adults<br>No. (%) |
|---------------------|-----------------------------|------------------------|----------------------------|------------------------------|
| <b>DRM to NRTI</b>  | <b>0</b>                    | <b>21 (55.3)</b>       | <b>2 (3.9)</b>             | <b>13 (43.3)</b>             |
|                     | <b>2 RT sequences</b>       | <b>38 RT sequences</b> | <b>51 RT sequences</b>     | <b>30 RT sequences</b>       |
| M184V/I             | 0                           | 19/1 (52.6)            | 0                          | 10/0 (33.3)                  |
| K219Q/N/E/R         | 0                           | 0/1/2/2 (13.2)         | 0                          | 1/1/3/1 (20)                 |
| T215F/Y/P/SY        | 0                           | 4/2/1/1 (21.1)         | 0                          | 1/0/0/0 (3.3)                |
| K70R/E              | 0                           | 3/0 (7.9)              | 0                          | 3/1 (13.3)                   |
| M41L                | 0                           | 5 (13.2)               | 1 (2)                      | 2 (6.7)                      |
| A62V, K65R          | 0                           | 1 (2.6)                | 0                          | 2 (6.7)                      |
| D67N/S/G            | 0                           | 0/1/1 (5.3)            | 0                          | 1/0/0 (3.3)                  |
| E44D                | 0                           | 2 (5.3)                | 1 (2)                      | 0                            |
| L74I                | 0                           | 2 (5.3)                | 0                          | 0                            |
| F77L, L210W         | 0                           | 1 (2.6)                | 0                          | 0                            |
| <b>DRM to NNRTI</b> | <b>0</b>                    | <b>26 (68.4)</b>       | <b>10 (19.6)</b>           | <b>20 (66.7)</b>             |
|                     | <b>2 RT sequences</b>       | <b>38 RT sequences</b> | <b>51 RT sequences</b>     | <b>30 RT sequences</b>       |
| K103N/H/S           | 0                           | 14/0/2 (42.1)          | 4/0/0 (7.8)                | 15/1/0 (53.3)                |
| G190S/A             | 0                           | 0/9 (23.7)             | 0/1 (2)                    | 1/1 (6.7)                    |
| A98G                | 0                           | 6 (15.8)               | 0                          | 5 (16.7)                     |
| V108I               | 0                           | 8 (21.1)               | 0                          | 3 (10)                       |
| Y181C               | 0                           | 5 (13.2)               | 0                          | 3 (10)                       |
| P225H               | 0                           | 2 (5.3)                | 0                          | 6 (20)                       |
| K101H/E             | 0                           | 1/2 (7.9)              | 0/1 (2)                    | 1/1 (6.7)                    |
| F227L               | 0                           | 4 (10.5)               | 0                          | 0                            |
| H221Y               | 0                           | 2 (5.3)                | 0                          | 1 (3.3)                      |
| K238T/N             | 0                           | 0/1 (2.6)              | 0                          | 2/0 (6.7)                    |
| V179E/D             | 0                           | 1/0 (2.6)              | 5/1 (11.8)                 | 1/0 (3.3)                    |
| V106I               | 0                           | 1 (2.6)                | 1 (2)                      | 1 (3.3)                      |
| Y318F, Y188L        | 0                           | 2 (5.3)                | 0                          | 0                            |
| M230L/I             | 0                           | 0/1 (2.6)              | 0                          | 1/0 (3.3)                    |
| E138A/Q             | 0                           | 0/1 (2.6)              | 2/0 (3.9)                  | 0                            |
| L234I               | 0                           | 0                      | 0                          | 1 (3.3)                      |
| <b>DRM to PI</b>    | <b>0</b>                    | <b>1 (2.6)</b>         | <b>1 (1.7)</b>             | <b>1 (3)</b>                 |
|                     | <b>2 PR sequences</b>       | <b>38 PR sequences</b> | <b>58 PR sequences</b>     | <b>33 PR sequences</b>       |
| <b>Major</b>        | 0                           | 1 (2.6)                | 0                          | 1 (3)                        |
| M46L                | 0                           | 1 (2.6)                | 0                          | 1 (3)                        |
| I54V, L76V, I84V    | 0                           | 1 (2.6)                | 0                          | 0                            |
| <b>Minor</b>        | 0                           | 0                      | 1 (1.7)                    | 0                            |
| L89V                | 0                           | 0                      | 1 (1.7)                    | 0                            |
| <b>DRM to INSTI</b> | <b>0</b>                    | <b>1 (3.2)</b>         | <b>4 (9.8)</b>             | <b>4 (17.4)</b>              |
|                     | <b>2 IN sequences</b>       | <b>31 IN sequences</b> | <b>41 IN sequences</b>     | <b>23 IN sequences</b>       |
| <b>Major</b>        | 0                           | 0                      | 1 (2.4)                    | 0                            |
| E92K                | 0                           | 0                      | 1 (2.4)                    | 0                            |
| <b>Minor</b>        | 0                           | 1 (3.2)                | 3 (7.3)                    | 4 (17.4)                     |
| T97A                | 0                           | 1 (3.2)                | 0                          | 3 (13)                       |
| E157Q               | 0                           | 0                      | 2 (4.9)                    | 1 (4.3)                      |
| G163K               | 0                           | 0                      | 1 (2.4)                    | 0                            |

**Table S3 Legend.** Available sequences in 141 subjects under study: 131PR, 121RT and 96IN. No, number; DRM, drug resistance mutation; NRTI, nucleoside reverse transcriptase inhibitors; NNRTI, non-NRTI; PI, protease

inhibitors; INSTI, integrase strand transfer inhibitors. We considered major and minor-DRM to PI, INSTI, NRTI and NNRTI, according to Stanford v9.0. DRM to INSTI E92K is an APOBEC mutation identified as a major-DRM by Stanford.

**Table S4.** Comparison of studies reporting HIV-1 resistance in Equatorial Guinea.

|                                                           | Djoko <i>et al.</i><br>2010 [30]<br>No. (%) | Yebra <i>et al.</i> <sup>#</sup><br>2013 [32]<br>No. (%) | Alvarez <i>et al.</i><br>2016 [29]<br>No. (%) | This study<br>No. (%) | P value |
|-----------------------------------------------------------|---------------------------------------------|----------------------------------------------------------|-----------------------------------------------|-----------------------|---------|
| Journal PMID                                              | 20718620                                    | 23717585                                                 | 27798676                                      |                       |         |
| Reference                                                 | 30                                          | 32                                                       | 29                                            |                       |         |
| Sampling year                                             | 2008                                        | 1997-2011                                                | 2012-2013                                     | 2019-2020             |         |
| Population from EG                                        | Military                                    | Equatoguineans<br>immigrants living in Spain             | Pregnant women                                | General               |         |
| % adults with sequence                                    | 41 (85.4)                                   | 186 (95.4)                                               | 38 (100)                                      | 96 (68.1)             |         |
| % children-adolescents with sequence                      | 0                                           | 9 (4.6)                                                  | 0                                             | 45 (31.9)             |         |
| Number of naïve/treated patients with <i>pol</i> sequence | 41/0                                        | 148/31                                                   | 8/30                                          | 61/80                 |         |
| TDR in naïve*                                             | 2 (4.8)                                     | 7 (4.7)                                                  | 0                                             | 6 (9.8)               | ns      |
| To NRTI                                                   | 1 (2.4)                                     | 2 (1.8)                                                  | 0                                             | 1 (1.9)               | ns      |
| To NNRTI                                                  | 0                                           | 1 (0.9)                                                  | 0                                             | 5 (9.4)               | *       |
| To PI                                                     | 1 (2.4)                                     | 5 (3.4)                                                  | 0                                             | 0                     | ns      |
| To INSTI                                                  | -                                           | -                                                        | -                                             | 0                     |         |
| DRM in treated                                            | -                                           | 9 (29)                                                   | 6 (20)                                        | 51 (63.8)             | ***     |
| To NRTI                                                   | -                                           | 3 (16.7)                                                 | 2 (8.7)                                       | 34 (50)               | **      |
| To NNRTI                                                  | -                                           | 5 (27.8)                                                 | 3 (13)                                        | 46 (67.6)             | ***     |
| To PI                                                     | -                                           | 5 (16.1)                                                 | 1 (3.7)                                       | 2 (2.8)               | *       |
| To INSTI                                                  | -                                           | -                                                        | -                                             | 0                     |         |

**Table S4 Legend.** No, number; EG, Equatorial Guinea; naïve, ART-naïve, treated, ART-treated; \*TDR, transmitted resistance mutations by Calibrated Population Resistance tool at Stanford HIV website; DRM, drug resistance mutations by Stanford algorithm; NRTI, nucleoside reverse transcriptase inhibitors; NNRTI, non-NRTI; PI, protease inhibitors; INSTI, integrase strand transfer inhibitors; dash, not done. # In Yebra *et al.* [32], the percentages were calculated according to the experience to each ARV-class, while in this table we considered as naïve subjects these with no previous experience to any ARV-family at sampling, and treated these with experience to at least one ARV-class; ns, not significant ( $P>0.05$ ); significant P values: \*,  $<0.05$ ; \*\*,  $<0.001$ ; \*\*\*,  $<0.0001$ .

**Table S5. Comparison of studies reporting HIV-1 variants in Equatorial Guinea.**

|                                   | Yebra et al. 2013<br>[32]<br>No. (%) | Alvarez et al. 2016<br>[29]<br>No. (%) | This study<br>No. (%) | P value |
|-----------------------------------|--------------------------------------|----------------------------------------|-----------------------|---------|
| Journal PMID                      | 23717585                             | 27798676                               |                       |         |
| Sampling year                     | 1997-2011                            | 2012-2013                              | 2019-2020             |         |
| Number of patients                | 278                                  | 69                                     | 237                   |         |
| % adults                          | 100%                                 | 100%                                   | 75.5%                 |         |
| Patients with <i>pol</i> sequence | 278 (100)                            | 38 (55.1)                              | 141 (59.5)            |         |
| HIV-1 variants                    |                                      |                                        |                       |         |
| Pure subtypes                     | 122 (43.9)                           | 9 (23.7)                               | 20 (14.1)             | ***     |
| A                                 | 38 (13.7)                            | 1 A3 (2.6)                             | 1 A1/5 A3 (4.3)       | *       |
| B                                 | 20 (7.2)                             | 1 (2.6)                                | 1 (0.7)               | *       |
| C                                 | 16 (5.7)                             | 4 (10.5)                               | 5 (3.5)               | ns      |
| D                                 | 14 (5)                               | 1 (2.6)                                | 1 (0.7)               | ns      |
| F                                 | 11 (4)                               | 1 F2 (2.6)                             | 1 F2 (0.7)            | ns      |
| G                                 | 15 (5.4)                             | 1 (2.6)                                | 4 (2.8)               | ns      |
| H                                 | 8 (2.9)                              | 0                                      | 1 (0.7)               | ns      |
| K                                 | 0                                    | 0                                      | 1 (0.7)               |         |
| Recombinants                      | 156 (56.1)                           | 29 (76.3)                              | 121 (85.8)            | ***     |
| CRF02_AG                          | 133 (47.8)                           | 21 (55.2)                              | 76 (53.9)             | ns      |
| CRF06_cpx                         | 4 (1.4)                              | 1 (2.6)                                | 3 (2.2)               | ns      |
| CRF09_cpx                         | 1 (0.4)                              | 0                                      | 0                     | ns      |
| CRF11_cpx                         | 7 (2.5)                              | 1 (2.6)                                | 0                     | ns      |
| CRF13_cpx                         | 3 (1.1)                              | 0                                      | 1 (0.7)               | ns      |
| CRF18_cpx                         | 1 (0.4)                              | 0                                      | 0                     | ns      |
| CRF22_01A1                        | 3 (1.1)                              | 4 (10.5)                               | 4 (2.8)               | *       |
| CRF26_AU                          | 0                                    | 0                                      | 5 (3.5)               | *       |
| CRF37_cpx                         | 0                                    | 0                                      | 2 (1.5)               | ns      |
| CPR45_cpx                         | 0                                    | 0                                      | 2 (1.5)               | ns      |
| URF                               | 4 (1.4)                              | 2 (5.3)                                | 28 (19.9)             | ***     |

**Table S5 Legend.** No, number; %, percentage; CRF, circulating recombinant forms; URF, unique recombinant forms; ns, not significant ( $P>0.05$ ); \*,  $<0.05$ ; \*\*\*,  $<0.0001$ .

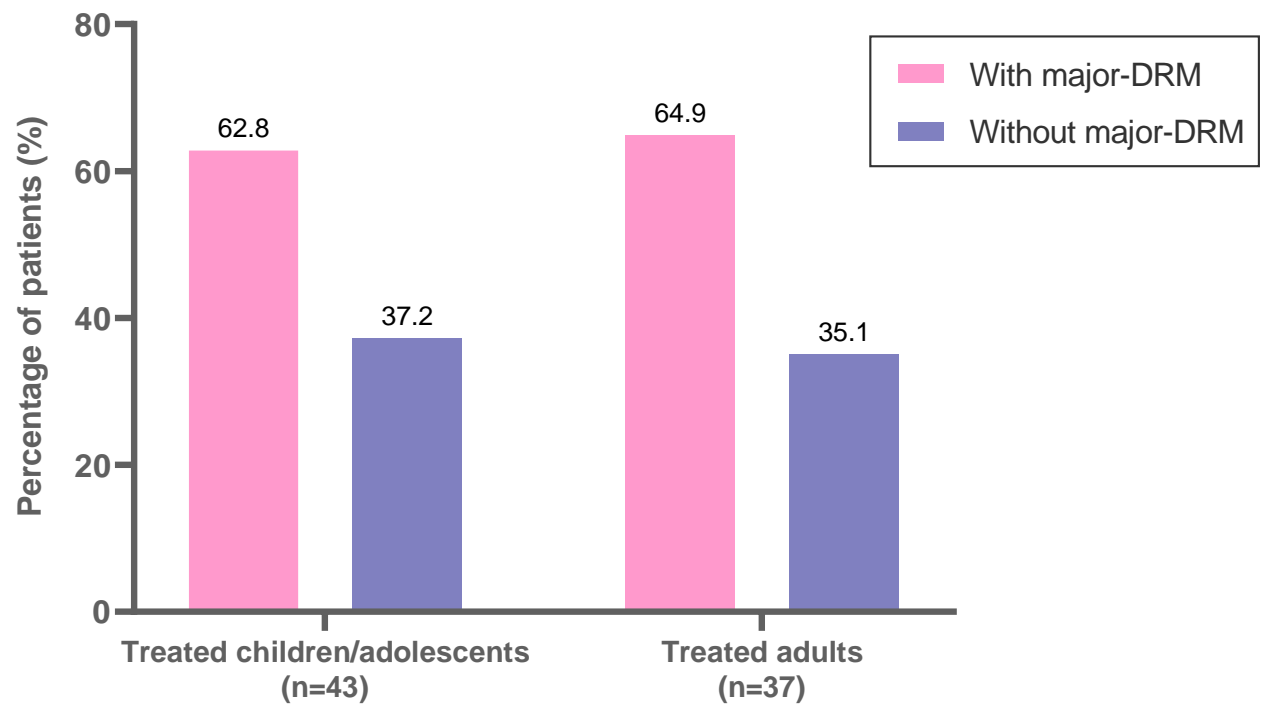

**Figure S1. Percentage of ART-treated patients under therapeutic failure with *vs.* without DRM among the 80 treated patients under study.** Available sequences in 43 children/adolescents and 37 adults. ART, antiretroviral; treated, ART-treated; DRM, drug resistance mutations.

| ID               | Protease Inhibitors (PI) |       |       |       |       |     |       |       | Nucleoside Reverse Transcriptase Inhibitors (NRTI) |     |     |     |     |     |     | Non-nucleoside Reverse Transcriptase Inhibitors (NNRTI) |     |     |     |     | Integrase Strand Transfer Inhibitors (INSTI) |     |     |     |     |
|------------------|--------------------------|-------|-------|-------|-------|-----|-------|-------|----------------------------------------------------|-----|-----|-----|-----|-----|-----|---------------------------------------------------------|-----|-----|-----|-----|----------------------------------------------|-----|-----|-----|-----|
|                  | ATV/r                    | DRV/r | FPV/r | IDV/r | LPV/r | NFV | SQV/r | TPV/r | ABC                                                | AZT | D4T | DDI | FTC | 3TC | TDF | DOR                                                     | EFV | ETR | NVP | RPV | BIC                                          | CAB | DTG | EVG | RAL |
| NAÏVE CHILDREN   |                          |       |       |       |       |     |       |       |                                                    |     |     |     |     |     |     |                                                         |     |     |     |     |                                              |     |     |     |     |
| 19.GE.NN.01      |                          |       |       |       |       |     |       |       |                                                    |     |     |     |     |     |     |                                                         |     |     |     |     |                                              |     |     |     |     |
| 19.GE.NN.21      |                          |       |       |       |       |     |       |       |                                                    |     |     |     |     |     |     |                                                         |     |     |     |     |                                              |     |     |     |     |
| TREATED CHILDREN |                          |       |       |       |       |     |       |       |                                                    |     |     |     |     |     |     |                                                         |     |     |     |     |                                              |     |     |     |     |
| 19.GE.NT.01      |                          |       |       |       | x     |     |       |       |                                                    | x   |     |     |     | x   |     |                                                         | x   |     |     |     |                                              |     |     |     |     |
| 19.GE.NT.02      |                          |       |       |       |       |     |       |       |                                                    | x   |     |     |     | x   |     |                                                         | x   |     |     |     |                                              |     |     |     |     |
| 19.GE.NT.03      |                          |       |       |       |       |     |       |       |                                                    | x   |     |     | x   | x   | x   |                                                         | x   |     | x   |     |                                              |     |     |     |     |
| 19.GE.NT.04      |                          |       |       |       |       |     |       |       |                                                    | x   |     |     |     | x   |     |                                                         | x   |     |     |     |                                              |     |     |     |     |
| 19.GE.NT.05      |                          |       |       |       |       |     |       |       |                                                    |     |     |     |     | x   | x   |                                                         |     |     |     |     |                                              |     | x   |     |     |
| 19.GE.NT.07      |                          |       |       |       |       |     |       |       |                                                    | x   |     |     |     | x   |     |                                                         | x   |     | x   |     |                                              |     |     |     |     |
| 19.GE.NT.09      |                          |       |       |       |       |     |       |       |                                                    | x   |     |     |     | x   |     |                                                         |     |     | x   |     |                                              |     |     |     |     |
| 19.GE.NT.10      |                          |       |       |       |       |     |       |       |                                                    | x   |     |     |     | x   |     |                                                         | x   |     | x   |     |                                              |     |     |     |     |
| 19.GE.NT.11      |                          |       |       |       | x     |     |       |       |                                                    | x   | x   |     |     | x   |     |                                                         | x   |     | x   |     |                                              |     |     |     |     |
| 19.GE.NT.12      |                          |       |       |       |       |     |       |       |                                                    | x   |     |     |     | x   |     |                                                         | x   |     |     |     |                                              |     |     |     |     |
| 19.GE.NT.13      |                          |       |       |       |       |     |       |       |                                                    | x   |     |     |     | x   |     |                                                         | x   |     | x   |     |                                              |     |     |     |     |

| ID          | Protease Inhibitors (PI) |       |       |       |       |     |       |       | Nucleoside Reverse Transcriptase Inhibitors (NRTI) |     |     |     |     |     |     | Non-nucleoside Reverse Transcriptase Inhibitors (NNRTI) |     |     |     |     | Integrase Strand Transfer Inhibitors (INSTI) |     |     |     |     |
|-------------|--------------------------|-------|-------|-------|-------|-----|-------|-------|----------------------------------------------------|-----|-----|-----|-----|-----|-----|---------------------------------------------------------|-----|-----|-----|-----|----------------------------------------------|-----|-----|-----|-----|
|             | ATV/r                    | DRV/r | FPV/r | IDV/r | LPV/r | NFV | SQV/r | TPV/r | ABC                                                | AZT | D4T | DDI | FTC | 3TC | TDF | DOR                                                     | EFV | ETR | NVP | RPV | BIC                                          | CAB | DTG | EVG | RAL |
| 19.GE.NT.14 |                          |       |       |       | X     |     |       |       |                                                    | X   |     |     |     | X   | X   |                                                         | X   |     | X   |     |                                              |     |     |     |     |
| 19.GE.NT.15 |                          |       |       |       | X     |     |       |       |                                                    | X   |     |     |     | X   | X   |                                                         |     |     |     |     |                                              |     |     |     |     |
| 19.GE.NT.16 |                          |       |       |       |       |     |       |       |                                                    | X   |     |     |     | X   |     |                                                         | X   | X   | X   | X   |                                              |     |     |     |     |
| 19.GE.NT.17 |                          |       |       |       |       |     |       |       | X                                                  | X   |     | X   | X   | X   |     | X                                                       | X   |     | X   |     |                                              |     |     |     |     |
| 19.GE.NT.18 |                          |       |       |       |       |     |       |       |                                                    | X   |     |     |     | X   |     |                                                         | X   |     |     |     |                                              |     |     |     |     |
| 19.GE.NT.19 |                          |       |       |       |       |     |       |       |                                                    | X   |     |     |     | X   |     |                                                         |     |     | X   |     |                                              |     |     |     |     |
| 19.GE.NT.20 |                          |       |       |       |       |     |       |       |                                                    | X   |     |     |     | X   |     |                                                         | X   |     | X   | X   |                                              |     |     |     |     |
| 19.GE.NT.23 |                          |       |       |       |       |     |       |       | X                                                  |     | X   | X   | X   | X   | X   | X                                                       | X   | X   | X   | X   |                                              |     |     |     |     |
| 19.GE.NT.24 |                          |       |       |       |       |     |       |       | X                                                  | X   | X   | X   | X   | X   |     | X                                                       | X   | X   | X   | X   |                                              |     |     |     |     |
| 19.GE.NT.25 |                          |       |       |       |       |     |       |       |                                                    | X   |     |     | X   | X   | X   |                                                         | X   |     |     |     |                                              |     |     |     |     |
| 19.GE.NT.26 |                          |       |       |       |       |     |       |       |                                                    | X   |     |     |     | X   | X   |                                                         | X   |     | X   |     |                                              |     |     |     |     |
| 19.GE.NT.27 |                          |       |       |       |       |     |       |       | X                                                  |     |     | X   | X   | X   |     |                                                         | X   |     | X   |     |                                              |     |     |     |     |
| 19.GE.NT.28 |                          |       |       |       | X     |     |       |       | X                                                  | X   | X   | X   | X   | X   | X   | X                                                       | X   |     | X   |     |                                              |     |     |     |     |
| 19.GE.NT.29 |                          |       |       |       |       |     |       |       |                                                    | X   |     |     |     | X   |     |                                                         | X   |     |     |     |                                              |     |     |     |     |
| 19.GE.NT.30 |                          |       |       |       |       |     |       |       | X                                                  | X   |     | X   | X   | X   |     | X                                                       | X   | X   | X   | X   |                                              |     |     |     |     |
| 19.GE.NT.31 |                          |       |       |       |       |     |       |       | X                                                  |     | X   | X   | X   | X   | X   | X                                                       | X   | X   | X   | X   |                                              |     |     |     |     |



| ID          | Protease Inhibitors (PI) |       |       |       |       |     |       |       | Nucleoside Reverse Transcriptase Inhibitors (NRTI) |     |     |     |     |     |     | Non-nucleoside Reverse Transcriptase Inhibitors (NNRTI) |     |     |     |     | Integrase Strand Transfer Inhibitors (INSTI) |     |     |     |     |
|-------------|--------------------------|-------|-------|-------|-------|-----|-------|-------|----------------------------------------------------|-----|-----|-----|-----|-----|-----|---------------------------------------------------------|-----|-----|-----|-----|----------------------------------------------|-----|-----|-----|-----|
|             | ATV/r                    | DRV/r | FPV/r | IDV/r | LPV/r | NFV | SQV/r | TPV/r | ABC                                                | AZT | D4T | DDI | FTC | 3TC | TDF | DOR                                                     | EFV | ETR | NVP | RPV | BIC                                          | CAB | DTG | EVG | RAL |
| 19.GE.NT.32 |                          |       |       |       |       |     |       |       |                                                    | X   |     |     |     | X   |     |                                                         |     |     | X   |     |                                              |     |     |     |     |
| 19.GE.NT.34 |                          |       |       |       |       |     |       |       |                                                    |     |     |     |     |     |     |                                                         |     |     |     |     |                                              |     |     |     |     |
| 19.GE.NT.37 |                          |       |       |       |       |     |       |       |                                                    |     |     |     |     |     |     |                                                         |     |     |     |     |                                              |     |     |     |     |
| 19.GE.NT.39 |                          |       |       |       |       |     |       |       |                                                    |     |     |     |     |     |     |                                                         |     |     |     |     |                                              |     |     |     |     |
| 19.GE.NT.40 |                          |       |       |       |       |     |       |       |                                                    |     |     |     |     | X   | X   |                                                         | X   |     |     |     |                                              |     |     |     |     |
| 19.GE.NT.41 |                          |       |       |       |       |     |       |       |                                                    | X   |     |     |     | X   |     |                                                         | X   |     |     |     |                                              |     |     |     |     |
| 19.GE.NT.42 |                          |       |       |       |       |     |       |       |                                                    | X   |     |     |     | X   |     |                                                         | X   |     |     |     |                                              |     |     |     |     |
| 19.GE.NT.43 |                          |       |       |       | X     |     |       |       |                                                    |     | X   |     | X   | X   | X   |                                                         | X   |     |     |     |                                              |     |     |     |     |
| 19.GE.NT.44 |                          |       |       |       |       |     |       |       |                                                    |     |     |     |     |     |     |                                                         |     |     |     |     |                                              |     |     |     |     |
| 19.GE.NT.45 |                          |       |       |       |       |     |       |       |                                                    | X   |     |     |     | X   |     |                                                         | X   |     | X   |     |                                              |     |     |     |     |
| 19.GE.NT.48 |                          |       |       |       | X     |     |       |       |                                                    | X   |     |     |     | X   | X   |                                                         | X   |     |     |     |                                              |     |     |     |     |
| 19.GE.NT.49 |                          |       |       |       |       |     |       |       |                                                    |     |     |     |     |     |     |                                                         |     |     |     |     |                                              |     |     |     |     |
| 19.GE.NT.50 |                          |       |       |       |       |     |       |       |                                                    | X   |     |     |     | X   |     |                                                         |     |     | X   |     |                                              |     |     |     |     |
| 19.GE.NT.55 |                          |       |       |       |       |     |       |       | X                                                  | X   |     |     |     | X   |     |                                                         | X   |     | X   |     |                                              |     |     |     |     |
| 19.GE.NT.59 |                          |       |       |       |       |     |       |       |                                                    | X   |     |     |     | X   | X   |                                                         |     |     | X   |     |                                              |     | X   |     |     |
| 19.GE.NT.60 |                          |       |       |       |       |     |       |       |                                                    | X   |     |     |     | X   |     |                                                         | X   |     | X   |     |                                              |     |     |     |     |



[illegible]

[illegible]

| ID             | Protease Inhibitors (PI) |       |       |       |       |     |       |       | Nucleoside Reverse Transcriptase Inhibitors (NRTI) |     |     |     |     |     |     | Non-nucleoside Reverse Transcriptase Inhibitors (NNRTI) |     |     |     |     | Integrase Strand Transfer Inhibitors (INSTI) |     |     |     |     |
|----------------|--------------------------|-------|-------|-------|-------|-----|-------|-------|----------------------------------------------------|-----|-----|-----|-----|-----|-----|---------------------------------------------------------|-----|-----|-----|-----|----------------------------------------------|-----|-----|-----|-----|
|                | ATV/r                    | DRV/r | FPV/r | IDV/r | LPV/r | NFV | SQV/r | TPV/r | ABC                                                | AZT | D4T | DDI | FTC | 3TC | TDF | DOR                                                     | EFV | ETR | NVP | RPV | BIC                                          | CAB | DTG | EVG | RAL |
| 19.GE.AN.71    |                          |       |       |       |       |     |       |       |                                                    |     |     |     |     |     |     |                                                         |     |     |     |     |                                              |     |     |     |     |
| 19.GE.AN.73    |                          |       |       |       |       |     |       |       |                                                    |     |     |     |     |     |     |                                                         |     |     |     |     |                                              |     |     |     |     |
| 19.GE.AN.74    |                          |       |       |       |       |     |       |       |                                                    |     |     |     |     |     |     |                                                         |     |     |     |     |                                              |     |     |     |     |
| 19.GE.AN.75    |                          |       |       |       |       |     |       |       |                                                    |     |     |     |     |     |     |                                                         |     |     |     |     |                                              |     |     |     |     |
| 19.GE.AN.76    |                          |       |       |       |       |     |       |       |                                                    |     |     |     |     |     |     |                                                         |     |     |     |     |                                              |     |     |     |     |
| 19.GE.AN.77    |                          |       |       |       |       |     |       |       |                                                    |     |     |     |     |     |     |                                                         |     |     |     |     |                                              |     |     |     |     |
| 19.GE.AN.78    |                          |       |       |       |       |     |       |       |                                                    |     |     |     |     |     |     |                                                         |     |     |     |     |                                              |     |     |     |     |
| 19.GE.AN.79    |                          |       |       |       |       |     |       |       |                                                    |     |     |     |     |     |     |                                                         |     |     |     |     |                                              |     |     |     |     |
| 19.GE.AN.80    |                          |       |       |       |       |     |       |       |                                                    |     |     |     |     |     |     |                                                         |     |     |     |     |                                              |     |     |     |     |
| 19.GE.EN.02    |                          |       |       |       |       |     |       |       |                                                    |     |     |     |     |     |     |                                                         |     |     |     |     |                                              |     |     |     |     |
| 19.GE.EN.05    |                          |       |       |       |       |     |       |       |                                                    |     |     |     |     |     |     |                                                         |     |     |     |     |                                              |     |     |     |     |
| 19.GE.EN.07    |                          |       |       |       |       |     |       |       |                                                    |     |     |     |     |     |     |                                                         |     |     |     |     |                                              |     |     |     |     |
| TREATED ADULTS |                          |       |       |       |       |     |       |       |                                                    |     |     |     |     |     |     |                                                         |     |     |     |     |                                              |     |     |     |     |
| 19.GE.AT.12    |                          |       |       |       | x     |     |       |       |                                                    | x   |     |     | x   | x   | x   |                                                         | x   |     |     |     |                                              |     |     |     |     |
| 19.GE.AT.13    |                          |       |       |       |       |     |       |       |                                                    |     |     |     | x   |     | x   |                                                         | x   |     |     |     |                                              |     |     |     |     |
| 19.GE.AT.20    |                          |       |       |       |       |     |       |       |                                                    |     |     |     | x   | x   | x   |                                                         | x   |     |     |     |                                              |     |     |     |     |

| ID          | Protease Inhibitors (PI) |       |       |       |       |     |       |       | Nucleoside Reverse Transcriptase Inhibitors (NRTI) |     |     |     |     |     |     | Non-nucleoside Reverse Transcriptase Inhibitors (NNRTI) |     |     |     |     | Integrase Strand Transfer Inhibitors (INSTI) |     |     |     |     |
|-------------|--------------------------|-------|-------|-------|-------|-----|-------|-------|----------------------------------------------------|-----|-----|-----|-----|-----|-----|---------------------------------------------------------|-----|-----|-----|-----|----------------------------------------------|-----|-----|-----|-----|
|             | ATV/r                    | DRV/r | FPV/r | IDV/r | LPV/r | NFV | SQV/r | TPV/r | ABC                                                | AZT | D4T | DDI | FTC | 3TC | TDF | DOR                                                     | EFV | ETR | NVP | RPV | BIC                                          | CAB | DTG | EVG | RAL |
| 19.GE.AT.22 |                          |       |       |       | X     |     |       |       |                                                    |     | X   |     |     | X   | X   |                                                         | X   |     | X   |     |                                              |     |     |     |     |
| 19.GE.AT.24 |                          |       |       |       | X     |     |       |       |                                                    | X   | X   |     |     | X   | X   |                                                         | X   |     | X   |     |                                              |     | X   |     |     |
| 19.GE.AT.29 |                          |       |       |       |       |     |       |       |                                                    |     | X   |     | X   | X   | X   |                                                         | X   |     | X   |     |                                              |     |     |     |     |
| 19.GE.AT.30 |                          |       |       |       |       |     |       |       |                                                    |     |     |     | X   | X   | X   |                                                         | X   |     |     |     |                                              |     | X   |     |     |
| 19.GE.AT.32 |                          |       |       |       |       |     |       |       |                                                    |     |     |     |     | X   | X   |                                                         | X   |     |     |     |                                              |     |     |     |     |
| 19.GE.AT.33 |                          |       |       |       |       |     |       |       |                                                    | X   |     |     | X   | X   | X   |                                                         |     |     | X   |     |                                              |     | X   |     |     |
| 19.GE.AT.34 |                          |       |       |       | X     |     |       |       |                                                    | X   | X   |     | X   | X   | X   |                                                         | X   |     | X   |     |                                              |     |     |     |     |
| 19.GE.AT.38 |                          |       |       |       |       |     |       |       |                                                    |     |     |     |     | X   | X   |                                                         | X   |     | X   |     |                                              |     |     |     |     |
| 19.GE.AT.39 |                          |       |       |       |       |     |       |       |                                                    |     | X   |     | X   | X   | X   |                                                         | X   |     | X   |     |                                              |     | X   |     |     |
| 19.GE.AT.40 |                          |       |       |       |       |     |       |       |                                                    | X   | X   |     | X   | X   |     |                                                         | X   |     | X   |     |                                              |     |     |     |     |
| 19.GE.AT.46 |                          |       |       |       | X     |     |       |       |                                                    |     | X   |     | X   | X   | X   |                                                         | X   |     | X   |     |                                              |     |     |     |     |
| 19.GE.AT.47 |                          |       |       |       |       |     |       |       |                                                    |     |     |     |     | X   | X   |                                                         | X   |     |     |     |                                              |     |     |     |     |
| 19.GE.AT.51 |                          |       |       |       | X     |     |       |       |                                                    | X   |     |     | X   | X   | X   |                                                         | X   |     | X   |     |                                              |     |     |     |     |
| 19.GE.AT.52 |                          |       |       |       |       |     |       |       |                                                    |     |     |     | X   | X   | X   |                                                         | X   |     |     |     |                                              |     | X   |     |     |
| 19.GE.AT.55 |                          |       |       |       |       |     |       |       |                                                    | X   | X   |     |     | X   | X   |                                                         | X   |     | X   |     |                                              |     |     |     |     |
| 19.GE.AT.57 |                          |       |       |       |       |     |       |       |                                                    |     |     |     |     | X   | X   |                                                         | X   |     |     |     |                                              |     |     |     |     |



| ID          | Protease Inhibitors (PI) |       |       |       |       |     |       |       | Nucleoside Reverse Transcriptase Inhibitors (NRTI) |     |     |     |     |     | Non-nucleoside Reverse Transcriptase Inhibitors (NNRTI) |     |     |     |     | Integrase Strand Transfer Inhibitors (INSTI) |     |     |     |     |     |
|-------------|--------------------------|-------|-------|-------|-------|-----|-------|-------|----------------------------------------------------|-----|-----|-----|-----|-----|---------------------------------------------------------|-----|-----|-----|-----|----------------------------------------------|-----|-----|-----|-----|-----|
|             | ATV/r                    | DRV/r | FPV/r | IDV/r | LPV/r | NFV | SQV/r | TPV/r | ABC                                                | AZT | D4T | DDI | FTC | 3TC | TDF                                                     | DOR | EFV | ETR | NVP | RPV                                          | BIC | CAB | DTG | EVG | RAL |
| 19.GE.MT.44 |                          |       |       |       |       |     |       |       |                                                    |     |     |     |     |     |                                                         |     |     |     |     |                                              |     |     |     |     |     |
| 19.GE.MT.45 |                          |       |       |       |       |     |       |       |                                                    |     |     |     |     |     |                                                         |     |     |     |     |                                              |     |     |     |     |     |

No sequence available   
  Susceptible   
  Potential resistance   
  Low level resistance   
  Intermediate resistance   
  High level resistance

**Figure S2. ARV susceptibility by Stanford in 141 patients samples with available *pol* sequence.** Predicted ARV susceptibility in 141 available sequences (131PR/121RT/97IN) and antiretroviral experience in each patient from Equatorial Guinea with available sequence under study. Patients' ID codes were provided in the laboratory after sample reception to maintain their anonymity. x, antiretroviral experience; NRTI, nucleoside reverse transcriptase inhibitors; NNRTI, non-NRTI; PI, protease inhibitors; INSTI, integrase strand transfer inhibitors. ATV/r, atazanavir/ritonavir; DRV/r, darunavir/ritonavir; FPV/r, fosamprenavir/ritonavir; IDV/r, indinavir/ritonavir; LPV/r, lopinavir/ritonavir; NFV, nelfinavir; SQV/r, saquinavir/ritonavir; TPV/r, tipranavir/ritonavir; ABC, abacavir; AZT, zidovudine; D4T, stavudine; DDI, didanosine; FTC, emtricitabine; 3TC, lamivudine; TDF, tenofovir; DOR, doravirine; EFV, efavirenz; ETR, etravirine; NVP, nevirapine; RPV, rilpivirine; BIC, bictegravir; CAB, cabotegravir; DTG, dolutegravir; EVG, elvitegravir; RAL, raltegravir.
